# Supplementary material
Source: PubMed Central journal article supplement (PMC3091898)
Supplement: 092190_3.pdf [file 092190_3.pdf]

| <b>Appendix 3:</b> Complete list of post-concussion signs/symptoms recorded by NHL team physicians over seven NHL regular seasons (1997–2004) |           |           |           |           |           |           |           |
|-----------------------------------------------------------------------------------------------------------------------------------------------|-----------|-----------|-----------|-----------|-----------|-----------|-----------|
| Signs/symptoms                                                                                                                                | 1997–1998 | 1998–1999 | 1999–2000 | 2000–2001 | 2001–2002 | 2002–2003 | 2003–2004 |
| Headache                                                                                                                                      | Yes       |
| Nausea                                                                                                                                        | Yes       |
| Neck pain                                                                                                                                     | Yes       |
| Fatigue/low energy                                                                                                                            | Yes       |
| Irritability                                                                                                                                  | Yes       |
| Nervous/anxious                                                                                                                               | Yes       |
| Blurred vision                                                                                                                                | Yes       |
| Photophobia/sensitivity to light                                                                                                              | Yes       |
| Dizziness                                                                                                                                     | Yes       |
| Vomiting                                                                                                                                      | Yes       |
| Amnesia                                                                                                                                       | Yes       |
| Loss of consciousness                                                                                                                         | Yes       |
| Depression/sadness                                                                                                                            | Yes       | Yes       | Yes       |           |           | Yes       | Yes       |
| Back pain                                                                                                                                     | Yes       | Yes       | Yes       |           |           |           |           |
| Syncopal episodes                                                                                                                             | Yes       | Yes       | Yes       |           |           |           |           |
| Personality change                                                                                                                            | Yes       | Yes       | Yes       |           |           |           |           |
| Decreased appetite                                                                                                                            | Yes       | Yes       | Yes       |           |           |           |           |
| Decreased libido                                                                                                                              | Yes       | Yes       | Yes       |           |           |           |           |
| Sleep disturbance                                                                                                                             | Yes       | Yes       | Yes       |           |           |           |           |
| Convergence difficulty                                                                                                                        | Yes       | Yes       | Yes       |           |           |           |           |
| Not oriented to person                                                                                                                        | Yes       | Yes       | Yes       |           |           |           |           |
| Not oriented to place                                                                                                                         | Yes       | Yes       | Yes       |           |           |           |           |
| Not oriented to time                                                                                                                          | Yes       | Yes       | Yes       |           |           |           |           |
| Vertigo                                                                                                                                       | Yes       | Yes       | Yes       |           |           |           |           |
| Altered information processing                                                                                                                | Yes       | Yes       | Yes       |           |           |           |           |
| Tinnitus                                                                                                                                      | Yes       | Yes       | Yes       | Yes       | Yes       |           |           |
| Diminished smell                                                                                                                              | Yes       | Yes       | Yes       | Yes       | Yes       |           |           |
| Diminished taste                                                                                                                              | Yes       | Yes       | Yes       | Yes       | Yes       |           |           |
| Seizure                                                                                                                                       | Yes       | Yes       | Yes       | Yes       | Yes       |           |           |
| Nystagmus                                                                                                                                     | Yes       | Yes       | Yes       | Yes       | Yes       |           |           |
| Hearing loss                                                                                                                                  | Yes       | Yes       | Yes       | Yes       | Yes       |           |           |
| Speech difficulties                                                                                                                           | Yes       | Yes       | Yes       | Yes       | Yes       |           |           |
| Diplopia                                                                                                                                      | Yes       | Yes       | Yes       | Yes       | Yes       |           |           |
| Altered pupil response                                                                                                                        | Yes       | Yes       | Yes       | Yes       | Yes       |           |           |
| Altered pupil size                                                                                                                            | Yes       | Yes       | Yes       | Yes       | Yes       |           |           |
| Loss of immediate recall                                                                                                                      | Yes       | Yes       | Yes       | Yes       | Yes       |           |           |
| Altered attention span                                                                                                                        | Yes       | Yes       | Yes       | Yes       | Yes       |           |           |
| Not oriented                                                                                                                                  |           |           |           | Yes       | Yes       |           |           |
| Concentration dysfunction                                                                                                                     |           |           |           | Yes       | Yes       | Yes       | Yes       |
| Memory dysfunction                                                                                                                            |           |           |           | Yes       | Yes       | Yes       | Yes       |
| Drowsiness                                                                                                                                    |           |           |           | Yes       | Yes       | Yes       | Yes       |

**Appendix to:** Benson BW, Meeuwisse WH, Rizos J. A prospective study of concussions among National Hockey League players during regular season games: the NHL-NHLPA Concussion Program. *CMAJ* 2011. DOI:10.1503/cmaj.092190.

|                                                                                                                                                                                                                                                                                                    |     |     |     |     |
|----------------------------------------------------------------------------------------------------------------------------------------------------------------------------------------------------------------------------------------------------------------------------------------------------|-----|-----|-----|-----|
| Confusion                                                                                                                                                                                                                                                                                          | Yes | Yes | Yes | Yes |
| "Don't feel right"                                                                                                                                                                                                                                                                                 | Yes | Yes | Yes | Yes |
| Sensitivity to noise                                                                                                                                                                                                                                                                               |     |     | Yes | Yes |
| Feeling like "in a fog"                                                                                                                                                                                                                                                                            |     |     | Yes | Yes |
| More emotional                                                                                                                                                                                                                                                                                     |     |     | Yes | Yes |
| Balance problems                                                                                                                                                                                                                                                                                   |     |     | Yes | Yes |
| Numbness/tingling                                                                                                                                                                                                                                                                                  |     |     | Yes | Yes |
| Feeling "pressure in head"                                                                                                                                                                                                                                                                         |     |     | Yes | Yes |
| Feeling slowed down                                                                                                                                                                                                                                                                                |     |     | Yes | Yes |
| Note: Since there was variability across seasons on which signs/symptoms were included on the Physician Evaluation Forms as part of the evolution of the NHL-NHLPA Concussion Program, only those symptoms that remained consistent over the seven seasons of study were included in the analyses. |     |     |     |     |

**Appendix to:** Benson BW, Meeuwisse WH, Rizos J. A prospective study of concussions among National Hockey League players during regular season games: the NHL-NHLPA Concussion Program. *CMAJ* 2011. DOI:10.1503/cmaj.092190.
