# Supplementary material
Source: PubMed Central journal article supplement (PMC3091898)
Supplement: 092190_5.pdf [file 092190_5.pdf]

**Appendix 5:** Univariate and multiple, adjusting for age (years) and position, linear regression analyses of potential predictors of time loss in days

| Predictors of time loss (days) | Univariate analysis                        |           |                | Multivariable adjusted analysis            |            |                |
|--------------------------------|--------------------------------------------|-----------|----------------|--------------------------------------------|------------|----------------|
|                                | Mean additional days lost (multiplicative) | 95% CI    | <i>p</i> value | Mean additional days lost (multiplicative) | 95% CI     | <i>p</i> value |
| Headache                       | 6.34                                       | 2.87–14.0 | 0.000          | 4.63                                       | 2.07–10.4  | 0.000          |
| Low energy / fatigue           | 5.70                                       | 2.34–13.9 | 0.000          | 3.41                                       | 1.34–8.67  | 0.010          |
| Amnesia                        | 3.65                                       | 1.45–9.20 | 0.006          | 3.31                                       | 1.23–8.92  | 0.018          |
| Abnormal neurological exam     | 6.53                                       | 2.21–19.3 | 0.001          | 3.89                                       | 1.32–11.5  | 0.014          |
| Loss of consciousness          | 2.22                                       | 0.84–5.89 | 0.109          | 1.29                                       | 0.470–3.55 | 0.619          |
| Dizziness                      | 3.82                                       | 1.76–8.31 | 0.001          | 1.43                                       | 0.635–3.22 | 0.387          |
| Nausea                         | 1.89                                       | 0.79–4.53 | 0.151          | 0.77                                       | 0.308–1.93 | 0.578          |
| Neck pain                      | 2.20                                       | 0.91–5.32 | 0.080          | 1.29                                       | 0.537–3.09 | 0.570          |
| Blurred vision                 | 1.77                                       | 0.73–4.30 | 0.206          | 1.29                                       | 0.541–3.09 | 0.562          |
| Light sensitivity              | 5.98                                       | 1.75–20.4 | 0.004          | 3.07                                       | 0.884–10.7 | 0.077          |
| Nervous/anxiety                | 4.81                                       | 1.18–19.6 | 0.029          | 1.29                                       | 0.291–5.72 | 0.737          |
| Irritability                   | 2.28                                       | 0.51–10.2 | 0.278          | 0.53                                       | 0.112–2.52 | 0.426          |
| Vomiting                       | 3.96                                       | 0.57–27.3 | 0.162          | 2.26                                       | 0.314–16.2 | 0.417          |

Note: CI = confidence interval
